# Supplementary material for: High Stretch Modulates cAMP/ATP Level in Association with Purine Metabolism via miRNA–mRNA Interactions in Cultured Human Airway Smooth Muscle Cells
Source: MDPI journal article supplement (doi:10.3390/cells13020110), 2024-01-05
Supplement: s1 [file s1]

**Table S2.** 283 targ DE-mRNAs by 12 DE-miRNAs.

| <b>Genes</b> | <b>FC</b> | <b>P<sub>adjust</sub></b> | <b>DE-miRNAs</b> |
|--------------|-----------|---------------------------|------------------|
| IL1A         | 45.345    | 5.502861296               | miR-543          |
| F2RL3        | 24.101    | 4.591025475               | miR-485-3p       |
| BHLHA15      | 17.985    | 4.168720779               | miR-370-5p       |
| HRK          | 17.273    | 4.11043176                | miR-485-3p       |
| TMCC3        | 16.224    | 4.020096691               | miR-485-3p       |
| RRAGD        | 15.554    | 3.95920424                | miR-543          |
| HYOU1        | 14.05     | 3.812462457               | miR-485-3p       |
| SLC3A2       | 13.999    | 3.807271338               | miR-27b-5p       |
| IFI30        | 13.957    | 3.80293007                | miR-27b-5p       |
| KLF15        | 13.286    | 3.731836449               | miR-485-3p       |
| PRDM16       | 12.153    | 3.603278416               | miR-543          |
| ATF3         | 12.089    | 3.595582725               | miR-485-3p       |
| KCP          | 8.573     | 3.099880343               | miR-370-5p       |
| REPS2        | 7.85      | 2.972600877               | miR-543          |
| IGSF3        | 7.468     | 2.900758057               | miR-543          |
| YJEFN3       | 6.691     | 2.742189302               | miR-485-3p       |
| FLRT2        | 6.636     | 2.730323526               | miR-370-5p       |
| SEL1L        | 6.585     | 2.719090373               | miR-485-3p       |
| PTPRR        | 6.466     | 2.692924138               | miR-485-3p       |
| RAB3IP       | 6.032     | 2.592603832               | miR-543          |
| BRCA2        | 5.981     | 2.580366517               | miR-27b-5p       |
| MCTP1        | 5.836     | 2.544978935               | miR-370-5p       |
| TGM1         | 5.817     | 2.540227543               | miR-335-3p       |
| SPOCK2       | 5.746     | 2.522532978               | miR-485-3p       |
| RENBP        | 5.686     | 2.507343735               | miR-370-5p       |
| OCLN         | 5.343     | 2.417728628               | miR-543          |
| LTB4R        | 5.2       | 2.37855433                | miR-335-3p       |
| SLC16A6      | 5.169     | 2.369769434               | miR-543          |
| EPHB1        | 5.157     | 2.366633083               | miR-370-5p       |
| MKINK2       | 4.775     | 2.255592335               | miR-27b-5p       |
| TLR2         | 4.705     | 2.234105732               | miR-27b-5p       |
| PLCG2        | 4.693     | 2.23058079                | miR-27b-5p       |
| SLC39A8      | 4.677     | 2.225604049               | miR-370-5p       |
| KDR          | 4.589     | 2.198080019               | miR-485-3p       |
| AK7          | 4.575     | 2.193814878               | miR-370-5p       |
| KYNU         | 4.538     | 2.182061652               | miR-27b-5p       |
| LRATD2       | 4.419     | 2.143591382               | miR-485-3p       |
| FAM174B      | 4.382     | 2.131666277               | miR-370-5p       |
| HSPA13       | 4.315     | 2.109268781               | miR-543          |

|          |       |             |            |
|----------|-------|-------------|------------|
| CNNM2    | 4.296 | 2.102989149 | miR-543    |
| DMKN     | 4.146 | 2.051667252 | miR-27b-5p |
| CRELD1   | 4.122 | 2.043233258 | miR-485-3p |
| ADTRP    | 4.083 | 2.029580189 | miR-370-5p |
| MIA2     | 4.018 | 2.006443339 | miR-543    |
| ATP2B1   | 3.939 | 1.97800901  | miR-370-5p |
| GREB1    | 3.825 | 1.935446116 | miR-370-5p |
| ALG12    | 3.745 | 1.904838732 | miR-27b-5p |
| HES6     | 3.702 | 1.888357965 | miR-370-5p |
| STAC     | 3.701 | 1.887899472 | miR-485-3p |
| OSGIN1   | 3.689 | 1.883395528 | miR-485-3p |
| CCDC171  | 3.679 | 1.879368062 | miR-543    |
| SLFN13   | 3.546 | 1.826328727 | miR-27b-5p |
| TMEM50B  | 3.476 | 1.797453063 | miR-485-3p |
| ARHGAP25 | 3.447 | 1.785454243 | miR-485-3p |
| SLC66A1  | 3.371 | 1.753302249 | miR-485-3p |
| IRF1     | 3.343 | 1.741100497 | miR-485-3p |
| PLEKHF1  | 3.322 | 1.732022665 | miR-335-3p |
| CHKA     | 3.301 | 1.722922855 | miR-485-3p |
| BRPF3    | 3.2   | 1.678275301 | miR-370-5p |
| BHLHE40  | 3.195 | 1.675786665 | miR-543    |
| XAF1     | 3.17  | 1.664416108 | miR-27b-5p |
| RAD9A    | 3.147 | 1.654166279 | miR-27b-5p |
| GFPT1    | 3.137 | 1.649534168 | miR-543    |
| MFSD2A   | 3.098 | 1.631212935 | miR-543    |
| CLCN3    | 3.055 | 1.61129876  | miR-370-5p |
| CPEB4    | 3.043 | 1.605695714 | miR-543    |
| GDPD1    | 3.032 | 1.600386761 | miR-27b-5p |
| CLN3     | 3.021 | 1.594918398 | miR-370-5p |
| PDE4D    | 2.982 | 1.576332418 | miR-370-5p |
| PCSK9    | 2.967 | 1.568852352 | miR-370-5p |
| FAM222A  | 2.959 | 1.565143101 | miR-543    |
| HM13     | 2.944 | 1.55791913  | miR-370-5p |
| ZNRF2    | 2.895 | 1.533354778 | miR-543    |
| RRAGC    | 2.89  | 1.530936318 | miR-543    |
| PPP1R3F  | 2.878 | 1.525248408 | miR-370-5p |
| NPTXR    | 2.862 | 1.516780852 | miR-485-3p |
| ZFAND2A  | 2.852 | 1.512017251 | miR-485-3p |
| TENT5A   | 2.802 | 1.486328385 | miR-335-3p |
| SRGAP2B  | 2.742 | 1.455411827 | miR-27b-5p |
| ARHGAP9  | 2.732 | 1.449779071 | miR-370-5p |
| CFAP20DC | 2.715 | 1.441083055 | miR-485-3p |
| ST3GAL6  | 2.687 | 1.425949185 | miR-370-5p |
| LRRC73   | 2.679 | 1.421550407 | miR-335-3p |

|          |       |             |            |
|----------|-------|-------------|------------|
| EPM2A    | 2.677 | 1.420368314 | miR-370-5p |
| WASHC2A  | 2.652 | 1.406928969 | miR-485-3p |
| GNS      | 2.651 | 1.40677278  | miR-370-5p |
| TG       | 2.627 | 1.393144976 | miR-485-3p |
| KCNA3    | 2.625 | 1.392356585 | miR-543    |
| POR      | 2.595 | 1.375489675 | miR-27b-5p |
| CLCN6    | 2.548 | 1.349187013 | miR-543    |
| GID4     | 2.545 | 1.347649064 | miR-543    |
| PIP4P2   | 2.544 | 1.346992857 | miR-485-3p |
| C19orf54 | 2.54  | 1.344919854 | miR-370-5p |
| FBLL1    | 2.535 | 1.342075525 | miR-27b-5p |
| KDSR     | 2.503 | 1.323788374 | miR-370-5p |
| ABHD6    | 2.476 | 1.308119767 | miR-485-3p |
| RNF13    | 2.443 | 1.288896218 | miR-543    |
| GOT1     | 2.437 | 1.284999561 | miR-485-3p |
| LRRC1    | 2.398 | 1.261912125 | miR-485-3p |
| MAP1LC3B | 2.398 | 1.261823485 | miR-370-5p |
| SLC25A37 | 2.366 | 1.242665474 | miR-485-3p |
| UAP1L1   | 2.343 | 1.228425604 | miR-370-5p |
| SELENOK  | 2.34  | 1.226705367 | miR-370-5p |
| CBLB     | 2.338 | 1.225494324 | miR-27b-5p |
| SOAT1    | 2.32  | 1.214242603 | miR-370-5p |
| TTLL7    | 2.309 | 1.207118038 | miR-543    |
| ATP6V1B2 | 2.296 | 1.199094452 | miR-370-5p |
| SOCS7    | 2.293 | 1.197056362 | miR-370-5p |
| CERT1    | 2.287 | 1.193192588 | miR-485-3p |
| FAM83G   | 2.266 | 1.180032393 | miR-485-3p |
| AP3D1    | 2.224 | 1.152915003 | miR-370-5p |
| SRGAP2C  | 2.223 | 1.152375328 | miR-27b-5p |
| ELAPOR1  | 2.212 | 1.145540367 | miR-485-3p |
| SLC31A1  | 2.212 | 1.145229711 | miR-543    |
| PNPLA3   | 2.2   | 1.137588721 | miR-370-5p |
| ANKRD10  | 2.198 | 1.136190264 | miR-370-5p |
| CPSF4    | 2.193 | 1.133157663 | miR-485-3p |
| ZCCHC2   | 2.172 | 1.119256833 | miR-485-3p |
| ASB1     | 2.147 | 1.102564742 | miR-370-5p |
| VEGFB    | 2.144 | 1.100153816 | miR-335-3p |
| HECA     | 2.141 | 1.098301213 | miR-543    |
| SYNGAP1  | 2.132 | 1.092218972 | miR-370-5p |
| YIPF4    | 2.129 | 1.090066095 | miR-543    |
| BMF      | 2.121 | 1.084704082 | miR-485-3p |
| ATF2     | 2.121 | 1.084514302 | miR-27b-5p |
| KRT18    | 2.113 | 1.079591078 | miR-27b-5p |
| MXI1     | 2.108 | 1.075587679 | miR-543    |

|          |       |              |             |
|----------|-------|--------------|-------------|
| FAM91A1  | 2.107 | 1.075312581  | miR-27b-5p  |
| LRP8     | 2.107 | 1.074994517  | miR-27b-5p  |
| OAS3     | 2.106 | 1.074550829  | miR-485-3p  |
| OSBPL3   | 2.096 | 1.067381897  | miR-543     |
| PPTC7    | 2.09  | 1.063580978  | miR-543     |
| EPHA2    | 2.085 | 1.059999106  | miR-485-3p  |
| RBCK1    | 2.073 | 1.051377918  | miR-485-3p  |
| ZFYVE27  | 2.067 | 1.047516363  | miR-370-5p  |
| KCTD13   | 2.054 | 1.038351419  | miR-370-5p  |
| PREB     | 2.05  | 1.035643151  | miR-370-5p  |
| TRPM7    | 2.04  | 1.028594435  | miR-543     |
| SLC1A3   | 2.023 | 1.016346712  | miR-485-3p  |
| MFSD9    | 2.015 | 1.010471808  | miR-335-3p  |
| RHOQ     | 2.01  | 1.006949722  | miR-543     |
| CTSA     | 2.004 | 1.002820123  | miR-370-5p  |
| SRI      | 0.497 | -1.007362724 | miR-194-5p  |
| NME1     | 0.497 | -1.008001514 | miR-146a-5p |
| TEDC2    | 0.491 | -1.027125399 | miR-192-5p  |
| ZNF106   | 0.489 | -1.032774422 | miR-192-5p  |
| RNF141   | 0.489 | -1.033546578 | miR-29b-3p  |
| CFL1     | 0.488 | -1.036372847 | miR-29b-3p  |
| PEX19    | 0.487 | -1.036687718 | miR-29b-3p  |
| DECR2    | 0.487 | -1.038676146 | miR-12136   |
| RBX1     | 0.483 | -1.048910686 | miR-194-5p  |
| RANBP6   | 0.481 | -1.056423885 | miR-194-5p  |
| GYG1     | 0.48  | -1.058972235 | miR-194-5p  |
| RASA4    | 0.479 | -1.06052844  | miR-194-5p  |
| TM4SF1   | 0.479 | -1.061367606 | miR-148a-3p |
| UACA     | 0.478 | -1.064953077 | miR-29b-3p  |
| CHN1     | 0.477 | -1.067434786 | miR-194-5p  |
| PRMT7    | 0.475 | -1.075234116 | miR-137-3p  |
| ALDH7A1  | 0.473 | -1.080473249 | miR-146a-5p |
| PXYLP1   | 0.472 | -1.082127911 | miR-29b-3p  |
| ARF5     | 0.471 | -1.086838556 | miR-29b-3p  |
| SOX6     | 0.471 | -1.086915326 | miR-194-5p  |
| BPHL     | 0.469 | -1.093691722 | miR-194-5p  |
| SEPTIN6  | 0.467 | -1.097458904 | miR-148a-3p |
| RFC2     | 0.466 | -1.101408075 | miR-146a-5p |
| ARHGAP20 | 0.463 | -1.111957743 | miR-148a-3p |
| TSPAN9   | 0.46  | -1.120461687 | miR-29b-3p  |
| LAMA4    | 0.454 | -1.140245434 | miR-148a-3p |
| SEPTIN11 | 0.452 | -1.144905881 | miR-194-5p  |
| TMEM237  | 0.452 | -1.145092089 | miR-29b-3p  |
| FBXO6    | 0.45  | -1.153333028 | miR-192-5p  |

|           |       |              |             |
|-----------|-------|--------------|-------------|
| TMEM256-  |       |              |             |
| PLSCR3    | 0.448 | -1.158449504 | miR-29b-3p  |
| TRPV4     | 0.446 | -1.164329772 | miR-29b-3p  |
| SRSF2     | 0.445 | -1.168261785 | miR-148a-3p |
| EEF1AKMT2 | 0.444 | -1.169862612 | miR-148a-3p |
| ATP2B4    | 0.44  | -1.183947492 | miR-29b-3p  |
| ABRAXAS1  | 0.439 | -1.186083686 | miR-194-5p  |
| FGD6      | 0.435 | -1.201520602 | miR-194-5p  |
| COL4A5    | 0.434 | -1.205585085 | miR-29b-3p  |
| ABCC6     | 0.433 | -1.208165472 | miR-146a-5p |
| C10orf143 | 0.432 | -1.210229622 | miR-146a-5p |
| SUB1      | 0.431 | -1.213608273 | miR-148a-3p |
| MMP11     | 0.431 | -1.215463726 | miR-29b-3p  |
| CARD10    | 0.428 | -1.223901777 | miR-146a-5p |
| PTPRD     | 0.427 | -1.228280646 | miR-194-5p  |
| ROR1      | 0.426 | -1.230051287 | miR-29b-3p  |
| SDC4      | 0.424 | -1.236215855 | miR-194-5p  |
| AK4       | 0.423 | -1.240589265 | miR-148a-3p |
| CCDC152   | 0.422 | -1.244877164 | miR-192-5p  |
| C1orf21   | 0.421 | -1.247023163 | miR-194-5p  |
| GLIPR2    | 0.421 | -1.249281766 | miR-148a-3p |
| RASA4B    | 0.42  | -1.251390024 | miR-194-5p  |
| NF2       | 0.42  | -1.251747264 | miR-146a-5p |
| HHIP      | 0.419 | -1.256680089 | miR-194-5p  |
| HSPG2     | 0.407 | -1.295266574 | miR-146a-5p |
| ANGPTL4   | 0.407 | -1.297275941 | miR-194-5p  |
| CACNB3    | 0.407 | -1.29842612  | miR-192-5p  |
| CHML      | 0.406 | -1.301368705 | miR-146a-5p |
| MYLK      | 0.401 | -1.316884043 | miR-192-5p  |
| CAV2      | 0.399 | -1.325637128 | miR-12136   |
| CREB5     | 0.39  | -1.359959653 | miR-192-5p  |
| ENPP1     | 0.389 | -1.360999906 | miR-194-5p  |
| PKNOX2    | 0.387 | -1.367907244 | miR-29b-3p  |
| GSN       | 0.386 | -1.371789146 | miR-148a-3p |
| PRPS1     | 0.384 | -1.381516233 | miR-146a-5p |
| PXMP2     | 0.383 | -1.385620305 | miR-29b-3p  |
| LIMCH1    | 0.382 | -1.387643114 | miR-194-5p  |
| PET100    | 0.38  | -1.397423533 | miR-192-5p  |
| PLSCR3    | 0.379 | -1.400721556 | miR-29b-3p  |
| AOPEP     | 0.373 | -1.42176815  | miR-146a-5p |
| SCRN2     | 0.363 | -1.463355188 | miR-29b-3p  |
| LSAMP     | 0.362 | -1.46460246  | miR-194-5p  |
| TNFAIP8   | 0.361 | -1.470720256 | miR-146a-5p |
| PXMP4     | 0.358 | -1.480569977 | miR-29b-3p  |

|            |       |              |             |
|------------|-------|--------------|-------------|
| RALGPS2    | 0.355 | -1.495836697 | miR-194-5p  |
| ANXA2      | 0.353 | -1.501677206 | miR-29b-3p  |
| GSTM2      | 0.352 | -1.505433741 | miR-148a-3p |
| LRRC8B     | 0.348 | -1.524872542 | miR-148a-3p |
| FAM229B    | 0.345 | -1.535357378 | miR-192-5p  |
| ACTA2      | 0.344 | -1.540984468 | miR-146a-5p |
| PIGB       | 0.337 | -1.570542418 | miR-146a-5p |
| A2M        | 0.334 | -1.581351915 | miR-146a-5p |
| ADGRL2     | 0.329 | -1.602529685 | miR-194-5p  |
| IFITM1     | 0.321 | -1.641292811 | miR-194-5p  |
| STMN1      | 0.316 | -1.662204236 | miR-194-5p  |
| DDAH1      | 0.316 | -1.663520878 | miR-29b-3p  |
| WNK4       | 0.31  | -1.688213927 | miR-146a-5p |
| CCDC88B    | 0.303 | -1.722517024 | miR-146a-5p |
| SOX11      | 0.299 | -1.741024154 | miR-194-5p  |
| PCSK5      | 0.294 | -1.76800081  | miR-29b-3p  |
| COL5A1     | 0.29  | -1.783842698 | miR-192-5p  |
| C5orf34    | 0.287 | -1.80219237  | miR-146a-5p |
| BARD1      | 0.284 | -1.817159332 | miR-192-5p  |
| PDGFD      | 0.261 | -1.940245187 | miR-29b-3p  |
| SETBP1     | 0.26  | -1.945307346 | miR-194-5p  |
| SERPINB9   | 0.256 | -1.963583407 | miR-29b-3p  |
| MTARC1     | 0.255 | -1.972703899 | miR-194-5p  |
| CAT        | 0.254 | -1.97950594  | miR-146a-5p |
| FANCA      | 0.252 | -1.990421226 | miR-194-5p  |
| MEX3A      | 0.25  | -1.999434592 | miR-194-5p  |
| MEST       | 0.243 | -2.043128757 | miR-29b-3p  |
| FERMT1     | 0.237 | -2.079104393 | miR-146a-5p |
| ACADS      | 0.235 | -2.090711433 | miR-192-5p  |
| DEPDC1B    | 0.235 | -2.091185655 | miR-194-5p  |
| ARNT2      | 0.233 | -2.1019904   | miR-148a-3p |
| KIAA1549L  | 0.233 | -2.104450933 | miR-194-5p  |
| GARNL3     | 0.232 | -2.109881754 | miR-146a-5p |
| GIN54      | 0.232 | -2.109981683 | miR-192-5p  |
| STXBP6     | 0.222 | -2.171396329 | miR-148a-3p |
| SCUBE3     | 0.221 | -2.181065684 | miR-29b-3p  |
| PDE5A      | 0.219 | -2.188645908 | miR-137-3p  |
| SLC7A14    | 0.21  | -2.24992727  | miR-148a-3p |
| KCND2      | 0.201 | -2.311776255 | miR-194-5p  |
| AC087632.2 | 0.201 | -2.317767904 | miR-146a-5p |
| AQP3       | 0.194 | -2.368690539 | miR-29b-3p  |
| NEDD9      | 0.183 | -2.448428747 | miR-146a-5p |
| NDRG2      | 0.17  | -2.553712458 | miR-148a-3p |
| CCNA2      | 0.163 | -2.613705527 | miR-29b-3p  |

|          |       |              |             |
|----------|-------|--------------|-------------|
| VASH2    | 0.153 | -2.706828732 | miR-29b-3p  |
| OIP5     | 0.148 | -2.753896368 | miR-194-5p  |
| CSRNP3   | 0.147 | -2.765900477 | miR-146a-5p |
| PMP22    | 0.146 | -2.777561276 | miR-29b-3p  |
| FNDC5    | 0.133 | -2.914170205 | miR-29b-3p  |
| OLFM1    | 0.129 | -2.950608913 | miR-148a-3p |
| NREP     | 0.123 | -3.025819063 | miR-137-3p  |
| MCM10    | 0.122 | -3.034446067 | miR-194-5p  |
| DKKL1    | 0.11  | -3.187875375 | miR-146a-5p |
| AURKB    | 0.109 | -3.196646781 | miR-148a-3p |
| HMMR     | 0.101 | -3.305753915 | miR-194-5p  |
| ACTN3    | 0.098 | -3.352952197 | miR-29b-3p  |
| THBS1    | 0.097 | -3.358613587 | miR-194-5p  |
| CDKN3    | 0.086 | -3.53352172  | miR-146a-5p |
| GUCY1B1  | 0.085 | -3.556282931 | miR-146a-5p |
| RAD54L   | 0.081 | -3.631623471 | miR-146a-5p |
| KCNJ6    | 0.078 | -3.684577323 | miR-192-5p  |
| LBH      | 0.069 | -3.85861911  | miR-192-5p  |
| PTGIS    | 0.063 | -3.996623614 | miR-146a-5p |
| PRC1     | 0.062 | -4.008707055 | miR-148a-3p |
| TMEM176A | 0.06  | -4.057066489 | miR-29b-3p  |
| JPH2     | 0.046 | -4.455913027 | miR-146a-5p |
| ELN      | 0.043 | -4.552607873 | miR-29b-3p  |
| PDE7B    | 0.04  | -4.636946512 | miR-29b-3p  |
| RAB7B    | 0.032 | -4.959717889 | miR-29b-3p  |
