# Supplementary material for: High Stretch Modulates cAMP/ATP Level in Association with Purine Metabolism via miRNA–mRNA Interactions in Cultured Human Airway Smooth Muscle Cells
Source: MDPI journal article supplement (doi:10.3390/cells13020110), 2024-01-05
Supplement: s1 [file s1]

**Table S4.** Significant enrichment of GO analysis of target DE-mRNAs in ASMCs.

| GO ID      | GO term                             | Category | Count | P <sub>Value</sub> | Genes                                                                                                                                                                                                                    |
|------------|-------------------------------------|----------|-------|--------------------|--------------------------------------------------------------------------------------------------------------------------------------------------------------------------------------------------------------------------|
| GO:0006816 | Calcium ion transport               | BP       | 7     | 0.001251           | EPM2A, CACNB3, TRPV4, TRPM7, SLC3A2, SRI, SELENOK                                                                                                                                                                        |
| GO:0043087 | Regulation of GTPase activity       | BP       | 7     | 0.001404           | ARHGAP9, FGD6, RASA4B, SYNGAP1, RASA4, CHN1, CBLB                                                                                                                                                                        |
| GO:0007165 | signal transduction                 | BP       | 31    | 0.002096           | ARHGAP9, PTPRR, HHIP, WNK4, NEDD9, CBLB, SRI, NDRG2, LRP8, SCUBE3, FAM83G, ARHGAP20, SYNGAP1, STMN1, CHN1, LRRC8B, CERT1, STAC, PDE4D, OSGIN1, ARHGAP25, FNDC5, OLFM1, CLCN6, TG, RASA4, PDE5A, PDE7B, RHOQ, F2RL3, TLR2 |
| GO:0071711 | Basement membrane organization      | BP       | 4     | 0.003029           | MMP11, FERMT1, FLRT2, CAV2                                                                                                                                                                                               |
| GO:0009267 | Cellular response to starvation     | BP       | 6     | 0.003338           | MAP1LC3B, RRAGC, RRAGD, PCSK9, MFSD2A, ELAPOR1                                                                                                                                                                           |
| GO:0045766 | Positive regulation of angiogenesis | BP       | 8     | 0.006696           | IL1A, PTGIS, DDAH1, VASH2, KDR, VEGFB, ANGPTL4, THBS1                                                                                                                                                                    |
| GO:0046034 | ATP metabolic process               | BP       | 4     | 0.009631           | ABCC6, ATP6V1B2, ENPP1, AK4                                                                                                                                                                                              |
| GO:0055074 | Calcium ion homeostasis             | BP       | 4     | 0.010461           | JPH2, ABCC6, WNK4, KDR                                                                                                                                                                                                   |
| GO:0016477 | Cell migration                      | BP       | 10    | 0.01209            | CLN3, DEPDC1B, SDC4, COL5A1, KCTD13, KDR, NEDD9, THBS1, RHOQ, EPHA2                                                                                                                                                      |
| GO:0032755 | Positive regulation                 | BP       | 6     | 0.012537           | IL1A, TRPV4, PLCG2, SELENOK, RAB7B, TLR2                                                                                                                                                                                 |

|                       |                                                         |    |    |          |                                                                                           |  |
|-----------------------|---------------------------------------------------------|----|----|----------|-------------------------------------------------------------------------------------------|--|
|                       | of interleukin-6 production                             |    |    |          |                                                                                           |  |
| GO:0030336            | Negative regulation of cell migration                   | BP | 8  | 0.012587 | SRGAP2C, IFITM1, MCTP1, LIMCH1, NEDD9, ABHD6, NF2, SRGAP2B                                |  |
| GO:0032760            | Positive regulation of tumor necrosis factor production | BP | 6  | 0.014056 | IL1A, OAS3, PLCG2, SELENOK, THBS1, TLR2                                                   |  |
| GO:0097284            | Hepatocyte apoptotic process                            | BP | 3  | 0.014622 | ATF2, KRT18, GSN                                                                          |  |
| GO:0055119            | Relaxation of cardiac muscle                            | BP | 3  | 0.014622 | GSTM2, GSN, PDE5A                                                                         |  |
| GO:0071639 production | Positive regulation of monocyte chemotactic protein-1   | BP | 3  | 0.016724 | OAS3, TRPV4, SELENOK                                                                      |  |
| GO:0051480            | Regulation of cytosolic calcium ion concentration       | BP | 4  | 0.018562 | CLN3, CAV2, ATP2B4, ATP2B1                                                                |  |
| GO:0030513            | Positive regulation of BMP signaling pathway            | BP | 4  | 0.018562 | SCUBE3, KDR, KCP, SOX11                                                                   |  |
| GO:0035556            | Intracellular signal transduction                       | BP | 13 | 0.021471 | GUCY1B1, RASA4B, STAC, WNK4, CBLB, DEPDC1B, RASA4, CHN1, STMN1, MKNK2, PLCG2, SOCS7, ASB1 |  |
| GO:0001666            | Response to hypoxia                                     | BP | 7  | 0.021519 | IL1A, ARNT2, CAT, VEGFB, ANGPTL4, THBS1, TLR2                                             |  |
| GO:0044090            | Positive regulation                                     | BP | 2  | 0.026606 | ANXA2, ELAPOR1                                                                            |  |

---

|            |                            |    |     |            |                                                                                                                                                                                                                                                                                                                                                                                                                                                                                                                                                                                                                                                                                                                                                                                                                                                                                                                                                                                                                                                                                      |
|------------|----------------------------|----|-----|------------|--------------------------------------------------------------------------------------------------------------------------------------------------------------------------------------------------------------------------------------------------------------------------------------------------------------------------------------------------------------------------------------------------------------------------------------------------------------------------------------------------------------------------------------------------------------------------------------------------------------------------------------------------------------------------------------------------------------------------------------------------------------------------------------------------------------------------------------------------------------------------------------------------------------------------------------------------------------------------------------------------------------------------------------------------------------------------------------|
|            | of vacuole<br>organization |    |     |            |                                                                                                                                                                                                                                                                                                                                                                                                                                                                                                                                                                                                                                                                                                                                                                                                                                                                                                                                                                                                                                                                                      |
| GO:0005515 | Protein binding            | MF | 200 | 0.00189884 | ATF2, IFITM1, HHIP, CBLB, IFI30, AQP3, MYLK, ZFYVE27, SYNGAP1, STMN1, KDR, FBXO6, SOX6, EPHB1, PKNOX2, HES6, ACTN3, BHLHA15, HSPG2, TM4SF1, POR, RRAGC, SOAT1, LRATD2, SUB1, RRAGD, KCTD13, PREB, RBCK1, ALDH7A1, ATF3, EPHA2, SDC4, MTARC1, WNK4, GNS, PRDM16, PLCG2, A2M, DECR2, BARD1, GSTM2, STAC, TMEM50B, RAB3IP, OSGIN1, CCDC88B, OCLN, TG, TMCC3, HYOU1, CPEB4, HRK, ARHGAP9, PTPRR, YJEFN3, ZFAND2A, ELN, SLC7A14, MIA2, PCSK9, BRCA2, PCSK5, MAP1LC3B, PIP4P2, JPH2, RALGPS2, PRMT7, KCND2, ANXA2, SERPINB9, RENBP, NME1, IL1A, PLSCR3, CRELD1, ANGPTL4, RAB7B, ARF5, RHOQ, TLR2, KCNA3, NEDD9, HSPA13, CHN1, RAD54L, ARNT2, PEX19, GSN, SLC31A1, YIPF4, TMEM176A, GINS4, AP3D1, VEGFB, LSAMP, SEPTIN6, C1ORF21, RANBP6, KRT18, RNF141, CDKN3, GUCY1B1, LRRC73, WASHC2A, TGM1, CFL1, SLC16A6, ENPP1, OIP5, GYG1, EPM2A, CARD10, PPTC7, VASH2, FAM91A1, RBX1, OLFM1, CACNB3, SRSF2, ROR1, ADTRP, CCDC152, TEDC2, SEL1L, SLC1A3, ABHD6, AK4, HMMR, NREP, NDRG2, FAM83G, SCUBE3, ANKRD10, BMF, KDSR, SOCS7, CERT1, CPSF4, BRPF3, CAV2, OSBPL3, FANCA, FAM229B, PTPRD, COL5A1, |

---

|            |                                             |    |    |             |                                                                                                                                                                                                                                                                          |                                                                                                                                                                                                                                                                                                                                                                                                      |
|------------|---------------------------------------------|----|----|-------------|--------------------------------------------------------------------------------------------------------------------------------------------------------------------------------------------------------------------------------------------------------------------------|------------------------------------------------------------------------------------------------------------------------------------------------------------------------------------------------------------------------------------------------------------------------------------------------------------------------------------------------------------------------------------------------------|
|            |                                             |    |    |             |                                                                                                                                                                                                                                                                          | TMEM237, TRPV4, PXMP2, BHLHE40, PXMP4, NF2, XAF1, RAD9A, TNFAIP8, PLEKHF1, RNF13, MCM10, DMKN, SEPTIN11, LBH, SCRIN2, PTGIS, RFC2, PDE4D, TENT5A, KLF15, CCNA2, SETBP1, IRF1, OAS3, ATP6V1B2, PXYLP1, PDE5A, CREB5, PRPS1, ABRAXAS1, HM13, SLC3A2, SRI, SELENOK, CLCN3, LRP8, UACA, THBS1, AURKB, CLN3, SPOCK2, MKNK2, MXI1, REPS2, LRRC8B, MEST, KCNJ6, ATP2B4, ATP2B1, SLC25A37, PRC1, PMP22, ASB1 |
| GO:0042802 | Identical protein binding                   | MF | 39 | 0.002739707 | ATF2, PRPS1, SDC4, MCM10, SRI, SELENOK, BRCA2, THBS1, AQP3, TGM1, SCUBE3, ZFYVE27, KDR, OIP5, A2M, CERT1, ACTN3, CHKA, ANXA2, SLC31A1, RAB3IP, VEGFB, BHLHA15, RENBP, NME1, TG, SOAT1, PRC1, TRPV4, SUB1, CAT, KCTD13, TMCC3, RBCK1, ANGPTL4, ALDH7A1, ATF3, CREB5, TLR2 |                                                                                                                                                                                                                                                                                                                                                                                                      |
| GO:0002020 | Protease binding                            | MF | 7  | 0.004716294 | ANXA2, SERPINB9, SRI, A2M, BRCA2, THBS1, F2RL3                                                                                                                                                                                                                           |                                                                                                                                                                                                                                                                                                                                                                                                      |
| GO:0005096 | GTPase activator activity                   | MF | 11 | 0.007735201 | ARHGAP9, ARHGAP20, DEPDC1B, RASA4B, SYNGAP1, RASA4, CHN1, PREB, CHML, ARHGAP25, GARNL3                                                                                                                                                                                   |                                                                                                                                                                                                                                                                                                                                                                                                      |
| GO:0048306 | Calcium-dependent protein binding           | MF | 6  | 0.009035789 | CLN3, PLSCR3, ANXA2, ATP2B4, A2M, LRP8                                                                                                                                                                                                                                   |                                                                                                                                                                                                                                                                                                                                                                                                      |
| GO:0051020 | GTPase binding                              | MF | 4  | 0.012732134 | RRAGC, RRAGD, RAB3IP, PREB                                                                                                                                                                                                                                               |                                                                                                                                                                                                                                                                                                                                                                                                      |
| GO:0097110 | scaffold protein binding                    | MF | 5  | 0.014410881 | KRT18, CAV2, PDE4D, PLCG2, ATP2B4                                                                                                                                                                                                                                        |                                                                                                                                                                                                                                                                                                                                                                                                      |
| GO:0004115 | 3',5'-cyclic-AMP phosphodiesterase activity | MF | 3  | 0.020556356 | PDE4D, ENPP1, PDE7B                                                                                                                                                                                                                                                      |                                                                                                                                                                                                                                                                                                                                                                                                      |

|            |                                                                  |    |    |             |                                                                                                                                                                                                                                          |
|------------|------------------------------------------------------------------|----|----|-------------|------------------------------------------------------------------------------------------------------------------------------------------------------------------------------------------------------------------------------------------|
| GO:0005178 | Integrin binding                                                 | MF | 7  | 0.023901888 | FERMT1, ACTN3, COL5A1, KDR, NF2, THBS1, HSPG2                                                                                                                                                                                            |
| GO:0098641 | Cadherin binding<br>involved in cell-cell<br>adhesion            | MF | 3  | 0.025734396 | KRT18, ANXA2, STXBP6                                                                                                                                                                                                                     |
| GO:0005524 | ATP binding                                                      | MF | 32 | 0.026270808 | PRPS1, WNK4, AK4, CLCN3, AK7, HSPA13, AURKB,<br>MYLK, MKNK2, KDR, ENPP1, RAD54L, TRPM7,<br>CNNM2, EPHB1, CHKA, RFC2, ABCC6, ATP2B4,<br>ATP2B1, RENBP, NME1, TTLL7, ACTA2, CLCN6,<br>SLFN13, OAS3, TRPV4, ATP6V1B2, HYOU1, ROR1,<br>EPHA2 |
| GO:0042803 | Protein<br>homodimerization<br>activity                          | MF | 18 | 0.030217761 | BARD1, EPM2A, ATF2, PRPS1, GSTM2, CHKA, CAV2,<br>HM13, THBS1, SRGAP2C, GLIPR2, KYNU, BHLHE40,<br>CAT, ENPP1, SOX6, GYG1, ATF3                                                                                                            |
| GO:0004550 | Nucleoside<br>diphosphate kinase<br>activity                     | MF | 3  | 0.031379982 | AK4, AK7, NME1                                                                                                                                                                                                                           |
| GO:0017124 | SH3 domain<br>binding                                            | MF | 6  | 0.032164615 | SYNGAP1, PLSCR3, CBLB, ZNF106, SOCS7, RAD9A                                                                                                                                                                                              |
| GO:0004114 | 3',5'-cyclic-<br>nucleotide<br>phosphodiesterase<br>activity     | MF | 3  | 0.034368752 | PDE4D, PDE5A, PDE7B                                                                                                                                                                                                                      |
| GO:0004714 | Transmembrane<br>receptor protein<br>tyrosine kinase<br>activity | MF | 4  | 0.037972433 | KDR, ROR1, EPHB1, EPHA2                                                                                                                                                                                                                  |

|            |                                             |    |    |             |                                                                                                                                                                                                                                                                                                                                                           |
|------------|---------------------------------------------|----|----|-------------|-----------------------------------------------------------------------------------------------------------------------------------------------------------------------------------------------------------------------------------------------------------------------------------------------------------------------------------------------------------|
| GO:0038024 | Cargo receptor activity                     | MF | 3  | 0.040660243 | MIA2, HMMR, LRP8                                                                                                                                                                                                                                                                                                                                          |
| GO:0016301 | Kinase activity                             | MF | 8  | 0.04263756  | PRPS1, CHKA, MKNK2, AK7, CERT1, EPHA2, CDKN3, MYLK                                                                                                                                                                                                                                                                                                        |
| GO:0046872 | Metal ion binding                           | MF | 49 | 0.043376334 | ATF2, GUCY1B1, PLEKHF1, RNF13, MCM10, MYLK, TGM1, ZFYVE27, ENPP1, OIP5, RASA4B, KCND2, PPTC7, LIMCH1, PDE4D, KLF15, DDAH1, RASA4, OAS3, CAT, PDE5A, RBCK1, NPTXR, CREB5, GDFD1, SLC1A3, GNS, AURKB, ZNRF2, FGD6, MKNK2, CHN1, PRDM16, RAD54L, ZNF106, TRPM7, BARD1, CPSF4, BRPF3, STAC, ATP2B4, ATP2B1, TTLL7, MEX3A, COL5A1, TRPV4, PDE7B, RNF141, CPEB4 |
| GO:0003824 | Catalytic activity                          | MF | 6  | 0.04473424  | DDAH1, MTARC1, KYNU, HHIP, SLC3A2, MEST                                                                                                                                                                                                                                                                                                                   |
| GO:0005201 | Extracellular matrix structural constituent | MF | 6  | 0.04473424  | COL5A1, LAMA4, ELN, COL4A5, CRELD1, THBS1                                                                                                                                                                                                                                                                                                                 |

BP: biological process; CC: cellular component; MF: molecular function.
