# Supplementary material for: High Stretch Modulates cAMP/ATP Level in Association with Purine Metabolism via miRNA–mRNA Interactions in Cultured Human Airway Smooth Muscle Cells
Source: MDPI journal article supplement (doi:10.3390/cells13020110), 2024-01-05
Supplement: s1 [file s1]

**Table S3.** Significant enriched KEGG pathway of 283 target DE-mRNAs.

| KEGG ID   | KEGG term                              | Count | P <sub>Value</sub> | Genes                                                              |
|-----------|----------------------------------------|-------|--------------------|--------------------------------------------------------------------|
| hsa00230  | Purine metabolism                      | 9     | 0.001              | PRPS1, GUCY1B1, PDE4D, ENPP1, AK4, PDE5A, PDE7B, AK7, NME1         |
| hsa04512  | ECM-receptor interaction               | 7     | 0.015              | SDC4, COL5A1, LAMA4, COL4A5, HMMR, THBS1, HSPG2                    |
| hsa03440: | Homologous recombination               | 4     | 0.029              | BARD1, ABRAXAS1, RAD54L, BRCA2                                     |
| hsa04146  | Peroxisome                             | 5     | 0.046              | PEX19, PXMP2, CAT, PXMP4, DECR2                                    |
| hsa04510  | Focal adhesion                         | 10    | 0.051              | ACTN3, COL5A1, CAV2, LAMA4, PDGFD, KDR, VEGFB, COL4A5, THBS1, MYLK |
| hsa04022  | cGMP-PKG signaling pathway             | 7     | 0.058              | ATF2, GUCY1B1, ATP2B4, PDE5A, ATP2B1, CREB5, MYLK                  |
| hsa04010  | MAPK signaling pathway                 | 10    | 0.062              | IL1A, ATF2, CACNB3, PTPRR, PDGFD, STMN1, MKNK2, KDR, VEGFB, EPHA2  |
| hsa04978  | Mineral absorption                     | 4     | 0.076              | SLC31A1, ATP2B4, TRPM7, ATP2B1                                     |
| hsa05418  | Fluid shear stress and atherosclerosis | 6     | 0.080              | IL1A, GSTM2, SDC4, CAV2, TRPV4, KDR                                |
| hsa05146  | Amoebiasis                             | 7     | 0.088              | ACTN3, COL5A1, LAMA4, COL4A5, SERPINB9, RAB7B, TLR2                |
| hsa04014  | Ras signaling pathway                  | 8     | 0.096              | RASA4B, SYNGAP1, RASA4, PDGFD, PLCG2, KDR, VEGFB, EPHA2            |
