# Supplementary material for: High Stretch Modulates cAMP/ATP Level in Association with Purine Metabolism via miRNA–mRNA Interactions in Cultured Human Airway Smooth Muscle Cells
Source: MDPI journal article supplement (doi:10.3390/cells13020110), 2024-01-05
Supplement: s1 [file s1]

**Table S1.** Primer sequence of mRNA and miRNAs.

| No | Genes          | Forward primer         | Reverse primer        |
|----|----------------|------------------------|-----------------------|
| 1  | AK4            | GCCCAGGCTAATCTATGAAG   | CAAGGAGCTCAAAAGCCTAT  |
| 2  | AK7            | GACTTTGCGGTGGAGACGTA   | CACTGAGTGCAGAGACTGCC  |
| 3  | ENPP1          | GGTGGA CTTCCTGTTATTA   | GGTGACAATGCTGTAGTGA   |
| 4  | PDE4D          | GACCAATGTCTCAGATCAGTGG | GTCAAGGGCCGGTTACCAG   |
| 5  | PDE7B          | AAGGCTGCTTCGTGGAATTA   | TCCATTTGTCAAGCGATCAA  |
| 6  | GADPH          | TGACGCTGGGGCTGGCATTG   | GGCTGGTGGTCCAGGGGTCT  |
| 7  | $\beta$ -actin | GGATGCAGAAGGAGATCACTG  | CGATCCACACGGAGTACTTG  |
| 8  | miR-370-5p     | CAGGUCACGUCUCUGCAGUUA  | GUAACUGCAGAGACGUGACCU |
|    | mimics         | C                      | G                     |
| 9  | Mimics NC      | UUCUCC GAACGUGUCACGUUU | ACGUGACACGUUCGGAGAAUU |
| 10 | miR-370-5p     | GUAACUGCAGAGACGUGACCU  |                       |
|    | inhibitor      | G                      |                       |
| 11 | Inhibitor NC   | CAGUACUUUUGUGUAGUACAA  |                       |
