# Supplementary material for: High Stretch Modulates cAMP/ATP Level in Association with Purine Metabolism via miRNA–mRNA Interactions in Cultured Human Airway Smooth Muscle Cells
Source: MDPI journal article supplement (doi:10.3390/cells13020110), 2024-01-05
Supplement: s1 [file s1]

**Table S5.** Significant enrichment of KEGG of first module of PPI.

| KEGG ID  | KEGG term                 | Count | PValue   | Genes                                                                       |
|----------|---------------------------|-------|----------|-----------------------------------------------------------------------------|
| hsa00230 | Purine metabolism         | 7     | 3.64E-06 | PDE4D, ENPP1, AK4, PDE5A, PDE7B, AK7, NME1                                  |
| hsa01232 | Nucleotide metabolism     | 4     | 0.002916 | ENPP1, AK4, AK7, NME1                                                       |
| hsa03440 | Homologous recombination  | 3     | 0.008482 | BARD1, RAD54L, BRCA2                                                        |
| hsa00380 | Tryptophan metabolism     | 3     | 0.008888 | KYNU, CAT, ALDH7A1                                                          |
| hsa01100 | Metabolic pathways        | 12    | 0.009186 | PDE4D, KYNU, CAT, ENPP1, AK4, PDE5A, PDE7B, GYG1, AK7, ACADS, ALDH7A1, NME1 |
| hsa01240 | Biosynthesis of cofactors | 4     | 0.014804 | KYNU, AK4, AK7, NME1                                                        |
